# Supplementary material for: Fate of copper in soil: effect of agrochemical (nano)formulations and soil properties
Source: Royal Society of Chemistry journal article supplement (doi:10.1039/d1en00213a), 2022-01-01

## Supporting Information

### Fate of copper in soil: effect of agrochemical (nano)formulations and soil properties

Melanie Kah<sup>1\*</sup>, Divina Navarro<sup>2,3</sup>, Walter Schenkeveld<sup>4</sup>, Rai S Kookana<sup>2,3</sup>, Jason K Kirby<sup>2</sup>,  
Swadeshmukul Santra<sup>5,6</sup>, Ali Ozcan<sup>5,6,7</sup>

<sup>1</sup>The University of Auckland, School of Environment, 23 Symonds street, Auckland 1010, New Zealand

<sup>2</sup>CSIRO Land & Water, Industry Environmentals Program, PMB 2 Glen Osmond, SA 5064, Australia

<sup>3</sup>University of Adelaide, School of Agriculture, Food and Wine, PMB 1, Glen Osmond 5064, Australia.

<sup>4</sup>Wageningen University, Soil Chemistry and Chemical Soil Quality, P.O. Box 47, 6700 AA Wageningen, The Netherlands

<sup>5</sup>NanoScience Technology Center, Department of Chemistry, University of Central Florida, Orlando, US

<sup>6</sup>Department of Materials Science and Engineering and Burnett School of Biomedical Sciences, University of Central Florida, Orlando, US

<sup>7</sup>Vocational School of Technical Sciences, Karamanoglu Mehmetbey University, 70200, Karaman, Turkey

\*[melanie.kah@auckland.ac.nz](mailto:melanie.kah@auckland.ac.nz)

## Contents

|                                                                                                                                                            |    |
|------------------------------------------------------------------------------------------------------------------------------------------------------------|----|
| Table S1. Parameters derived by nonlinear curve fitting.....                                                                                               | S2 |
| Table S2. Multi-surface equilibrium modelling parameters and predictions .....                                                                             | S3 |
| Figure S1. Extractable Cu over a 29 days incubation for three soils (S1-S3).....                                                                           | S4 |
| Figure S2. pH measured in CaCl <sub>2</sub> 0.01M suspensions (soil comparisons). .....                                                                    | S5 |
| Figure S3. pH measured in CaCl <sub>2</sub> 0.01M suspensions (t=0 vs t=29 days).....                                                                      | S6 |
| Figure S4. Free Cu <sup>2+</sup> concentration in equilibrium with Cu(OH) <sub>2</sub> (s) and Cu <sub>2</sub> (OH) <sub>2</sub> CO <sub>3</sub> (s) ..... | S7 |

Table S1. Parameters derived by nonlinear curve fitting with a pseudo first order kinetics (one phase association)

$$y_t = y_0 + (\text{plateau} - y_0) \times (1 - e^{-kt})$$

| <b>S1</b>                     | <b>Si50</b> | <b>Si500</b> | <b>CuSO<sub>4</sub></b> | <b>Tribasic*</b> | <b>nCuO</b> | <b>Kocide</b> | <b>Cu(OH)<sub>2</sub></b> | <b>ChampDP</b> | <b>GO</b> |
|-------------------------------|-------------|--------------|-------------------------|------------------|-------------|---------------|---------------------------|----------------|-----------|
| <b>Y<sub>0</sub></b> (mg/kg)  | 0.132       | 0.121        | 0.150                   | 0.193            | 0.011       | 0.096         | 0.124                     | 0.175          | 0.044     |
| <b>Plateau</b> (mg/kg)        | 0.074       | 0.080        | 0.075                   | ~ -62.90         | 0.053       | 0.051         | 0.059                     | 0.076          | 0.025     |
| <b>k</b> (day <sup>-1</sup> ) | 0.325       | 0.333        | 0.403                   | ~ 4.630e-005     | 0.064       | 0.418         | 0.418                     | 0.660          | 0.373     |
| <b>Half-time</b> (day)        | 2.131       | 2.081        | 1.721                   | ~ 14971          | 10.880      | 1.657         | 1.657                     | 1.050          | 1.858     |
| <b>R<sup>2</sup></b>          | 0.973       | 0.855        | 0.967                   | 0.598            | 0.973       | 0.962         | 0.954                     | 0.937          | 0.932     |

\*ambiguous fit

| <b>S2</b>                     | <b>Si50</b> | <b>Si500</b> | <b>CuSO<sub>4</sub></b> | <b>Tribasic</b> | <b>nCuO</b> | <b>Kocide</b> | <b>Cu(OH)<sub>2</sub></b> | <b>ChampDP</b> | <b>GO</b> |
|-------------------------------|-------------|--------------|-------------------------|-----------------|-------------|---------------|---------------------------|----------------|-----------|
| <b>Y<sub>0</sub></b> (mg/kg)  | 0.815       | 0.599        | 0.903                   | 1.020           | 0.040       | 0.560         | 0.544                     | 0.541          | 0.173     |
| <b>Plateau</b> (mg/kg)        | 0.364       | 0.436        | 0.557                   | 0.673           | 0.332       | 0.409         | 0.410                     | 0.411          | 0.135     |
| <b>k</b> (day <sup>-1</sup> ) | 0.295       | 0.780        | 0.518                   | 0.455           | 0.238       | 0.621         | 0.666                     | 0.791          | 0.270     |
| <b>Half-time</b> (day)        | 2.348       | 0.888        | 1.337                   | 1.523           | 2.915       | 1.117         | 1.041                     | 0.877          | 2.566     |
| <b>R<sup>2</sup></b>          | 0.858       | 0.408        | 0.892                   | 0.832           | 0.969       | 0.863         | 0.876                     | 0.883          | 0.852     |

| <b>S3</b>                     | <b>Si50</b> | <b>Si500</b> | <b>CuSO<sub>4</sub></b> | <b>Tribasic</b> | <b>nCuO</b> | <b>Kocide</b> | <b>Cu(OH)<sub>2</sub></b> | <b>ChampDP</b> | <b>GO</b> |
|-------------------------------|-------------|--------------|-------------------------|-----------------|-------------|---------------|---------------------------|----------------|-----------|
| <b>Y<sub>0</sub></b> (mg/kg)  | 0.101       | 0.097        | 0.094                   | 0.145           | 0.012       | 0.072         | 0.108                     | 0.114          | 0.045     |
| <b>Plateau</b> (mg/kg)        | 0.047       | 0.045        | 0.043                   | 0.051           | 0.034       | 0.033         | 0.046                     | 0.048          | 0.021     |
| <b>k</b> (day <sup>-1</sup> ) | 0.250       | 0.319        | 0.227                   | 0.179           | 0.211       | 0.338         | 0.318                     | 0.265          | 0.257     |
| <b>Half-time</b> (day)        | 2.776       | 2.175        | 3.053                   | 3.884           | 3.286       | 2.049         | 2.179                     | 2.614          | 2.697     |
| <b>R<sup>2</sup></b>          | 0.980       | 0.974        | 0.982                   | 0.978           | 0.952       | 0.978         | 0.959                     | 0.960          | 0.982     |

Table S2. Multi-surface equilibrium modelling parameters and predictions

| Soil                       | pH <sup>a</sup> | Soil model                               |                    |                  | Solution model               |                              | Plateau/<br>Cu-CaCl <sub>2</sub><br>at t=∞<br>(mg kg <sup>-1</sup> ) <sup>b</sup> | Predicted equilibrium<br>CaCl <sub>2</sub> -extractable Cu<br>conc.<br>(mg kg <sup>-1</sup> ) <sup>c</sup> |
|----------------------------|-----------------|------------------------------------------|--------------------|------------------|------------------------------|------------------------------|-----------------------------------------------------------------------------------|------------------------------------------------------------------------------------------------------------|
|                            |                 | Reactive<br>Cu<br>(mg kg <sup>-1</sup> ) | Cu-OM<br>%         | Cu-<br>FeOx<br>% | log free<br>Cu <sup>2+</sup> | log free<br>Cu <sup>2+</sup> |                                                                                   |                                                                                                            |
| <u>No added Cu</u>         |                 |                                          |                    |                  |                              |                              |                                                                                   |                                                                                                            |
| S1                         | 6.92            | 0.21                                     | 100.00             | 0.00             | -13.6                        | -10.8                        |                                                                                   |                                                                                                            |
| S2                         | 5.54            | 2.17                                     | 99.83              | 0.17             | -9.1                         | -9.2                         |                                                                                   |                                                                                                            |
| S3                         | 5.89            | 4.08                                     | 99.99              | 0.01             | -11.8                        | -11.0                        |                                                                                   |                                                                                                            |
| <u>With Cu application</u> |                 |                                          |                    |                  |                              |                              |                                                                                   |                                                                                                            |
| S1                         | 6.4             | 50.21                                    | 92.06 <sup>d</sup> | 7.67             | -6.5                         | -7.3                         | 0.06                                                                              | 0.26                                                                                                       |
| S2                         | 5.0             | 52.17                                    | 97.07              | 1.52             | -5.8                         | -6.2                         | 0.41                                                                              | 0.76                                                                                                       |
| S3                         | 6.1             | 54.08                                    | 99.34              | 0.66             | -9.2                         | -8.9                         | 0.04                                                                              | 0.04                                                                                                       |

<sup>a</sup>pH value measured for each soil in CaCl<sub>2</sub>; Lower pH value measured in each soil at t=29 days (see Figure S2 and S3)

<sup>b</sup>Derived from fitting the kinetics. Average value for the nine formulations considered

<sup>c</sup>Predicted equilibrium CaCl<sub>2</sub>-extractable Cu concentration; determined by predicting the free Cu<sup>2+</sup> concentration using the Soil model, and implementing this free Cu<sup>2+</sup> concentration into the solution model to predict the total dissolve Cu concentration. (This is the inverse modelling route as by which the free Cu<sup>2+</sup> concentration was determined from the measured total Cu concentration in CaCl<sub>2</sub> extracts at 28 days)

<sup>d</sup>Percentages do not add up to 100% because of the contribution of Cu not associated with soil organic matter and Fe(hydr)oxide minerals (e.g. Cu<sup>2+</sup> (aq), Cu(OH)<sup>+</sup>(aq)) to the total reactive Cu pool.

- Before Cu amendment, the Soil and Solution models are in reasonable agreement (within 1 log unit) for S2 and S3.
- For S1, the Soil model underestimates the free Cu concentration computed by the Solution model (2.8 log units). The cause for the discrepancy is unclear.
- After Cu amendment, the Soil and Solution models are again in good agreement for S2 and S3 (up to 0.4 log units difference).
- The Soil model for S1 overestimates the free Cu concentration in solution by 0.8 log units.
- A possible explanation for the overestimation could be of Cu-bearing minerals. However, Figure S4 showing the free Cu<sup>2+</sup> concentration in equilibrium with Cu(OH)<sub>2</sub> and Cu<sub>2</sub>(OH)<sub>2</sub>CO<sub>3</sub> as a function of pH suggests that precipitation is unlikely to play an important role under the conditions measured in S1. The reasons why the model overestimated the dissolved Cu thus remain uncertain.
- The CaCl<sub>2</sub> extractable concentration at t=∞ from the kinetic model (Plateau) and the predicted equilibrium CaCl<sub>2</sub>-extractable Cu concentration are in reasonable agreement, with a difference by a factor of 4.2 for S1, 1.8 for S2 and 1.1 for S3. The ranking of the measured Cu concentrations corresponds with the modelled results (i.e. higher Cu concentration in S2 than in S3).

Figure S1. Extractable Cu over a 29 days incubation for three soils (S1-S3) spiked with nine different forms of Cu.

Results are expressed in mg/kg (data on Figure 1 are in % of Cu added). Error bars are the standard deviation between triplicates (often smaller than the symbols). The dashed lines are fits with a one-phase association model. Fitted parameters are presented in Table S1.

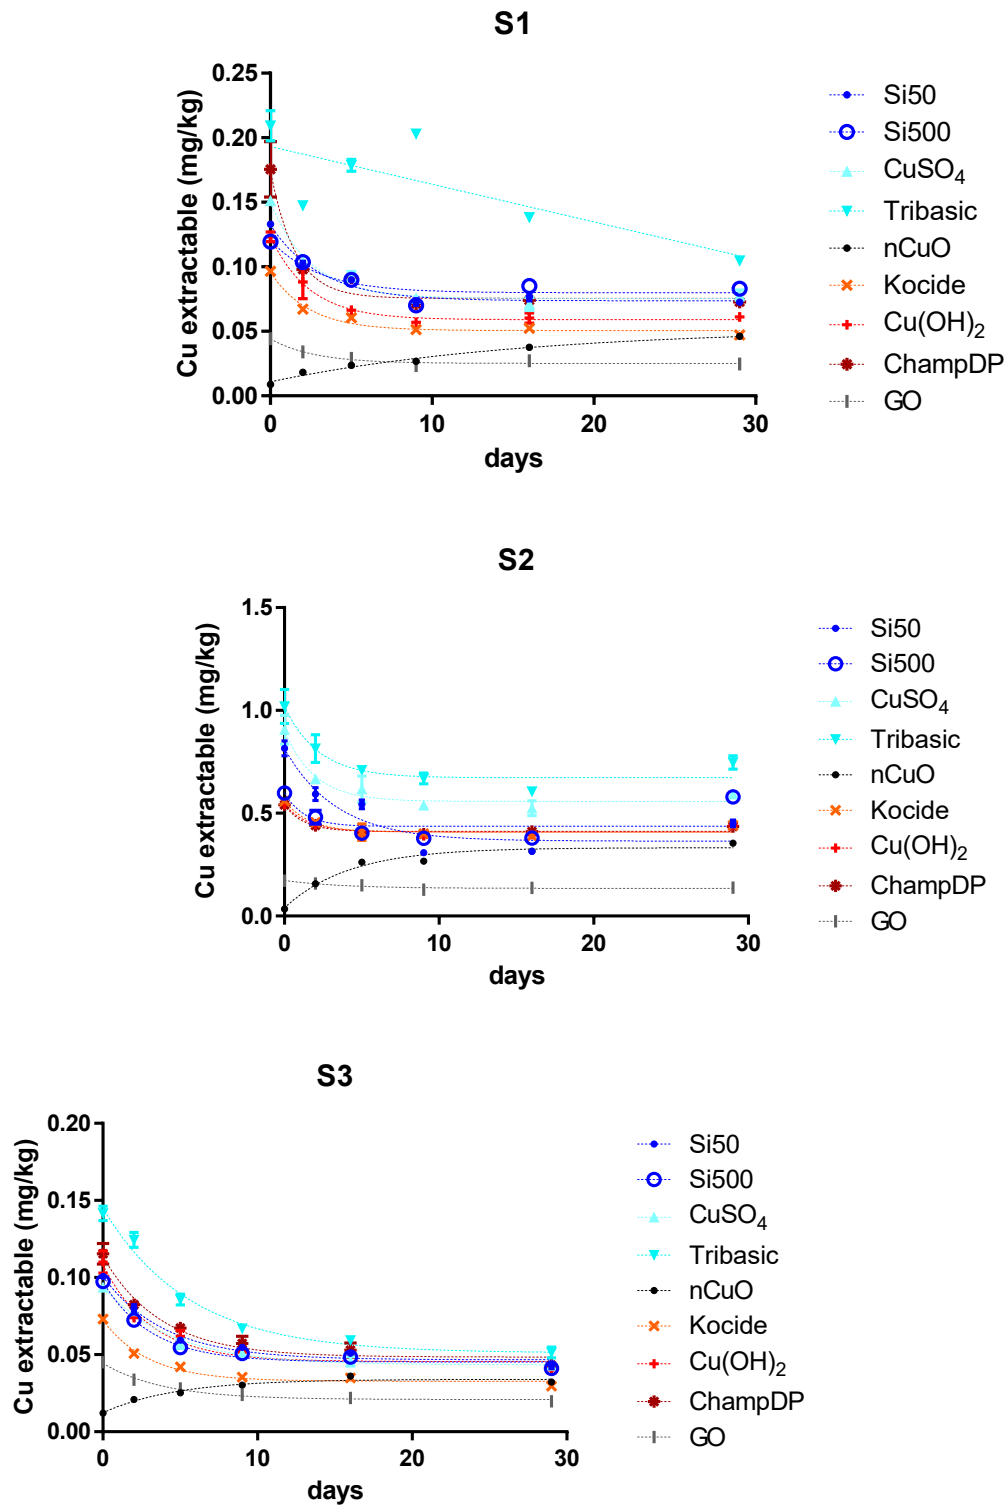

Figure S2. pH measured in CaCl<sub>2</sub> 0.01M suspensions after the addition of different forms of Cu.

The dashed line shows the pH of soil controls, which did not receive Cu additions. Error bars are for triplicates (often smaller than the symbols)

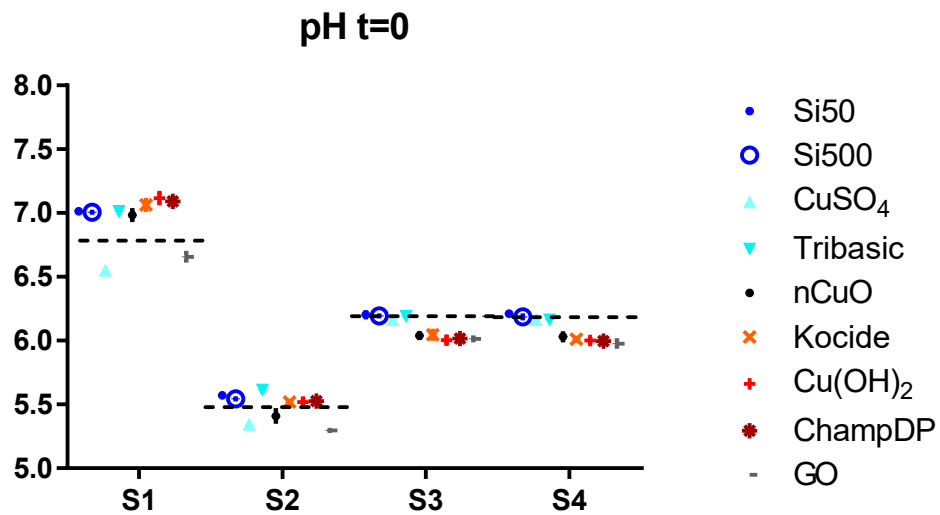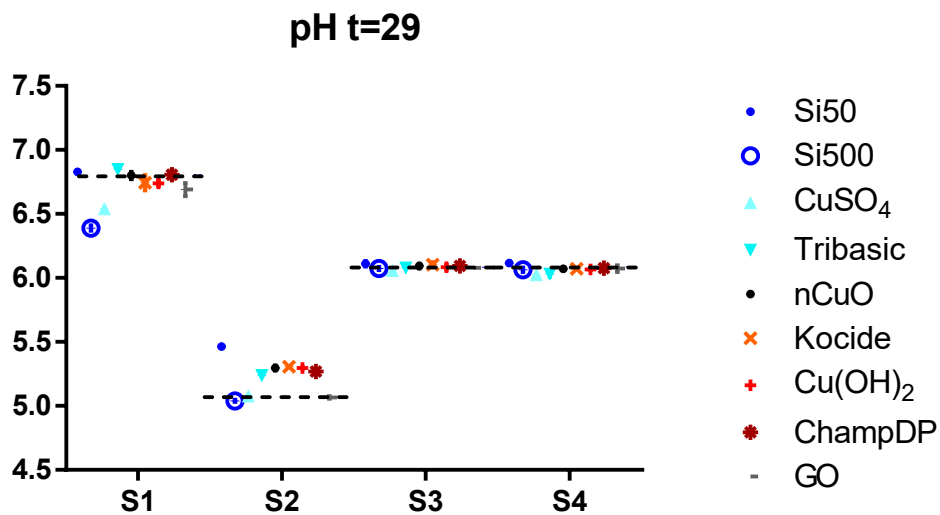

Figure S3. pH measured in CaCl<sub>2</sub> 0.01M suspensions after the addition of different forms of Cu.

The dashed line shows the pH of soil controls, which did not receive Cu additions. The data is the same as Figure S2 but allows an easier comparison between pH values measured at t=0 and t=29. Error bars are for triplicates (often smaller than the symbols).

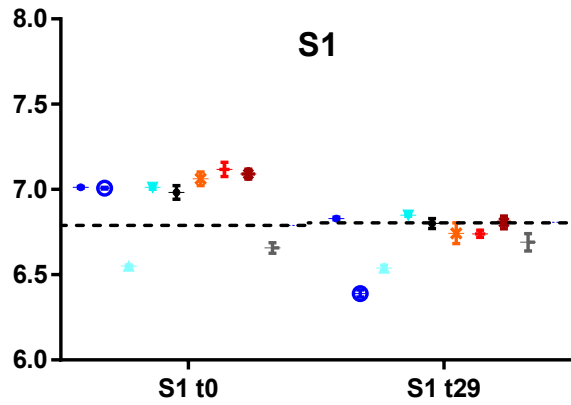

- Si50
- Si500
- ▲ CuSO<sub>4</sub>
- ▼ Tribasic
- nCuO
- × Kocide
- + Cu(OH)<sub>2</sub>
- ChampDP
- GO

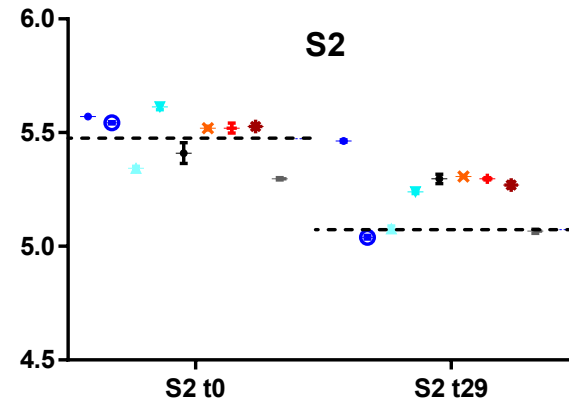

- Si50
- Si500
- ▲ CuSO<sub>4</sub>
- ▼ Tribasic
- nCuO
- × Kocide
- + Cu(OH)<sub>2</sub>
- ChampDP
- GO

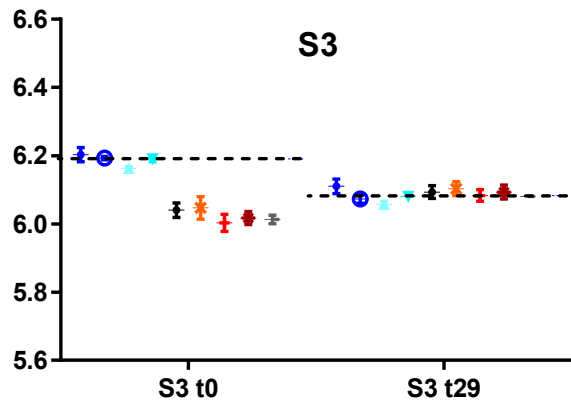

- Si50
- Si500
- ▲ CuSO<sub>4</sub>
- ▼ Tribasic
- nCuO
- × Kocide
- + Cu(OH)<sub>2</sub>
- ChampDP
- GO

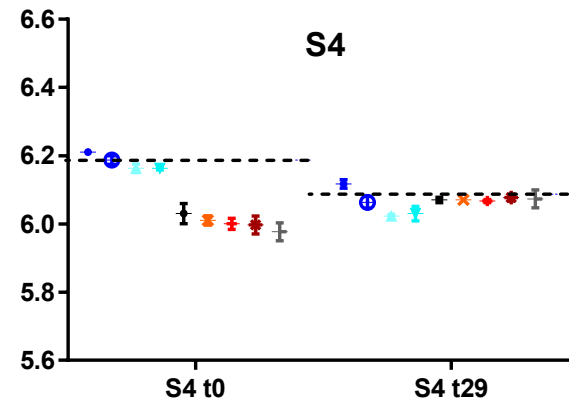

- Si50
- Si500
- ▲ CuSO<sub>4</sub>
- ▼ Tribasic
- nCuO
- × Kocide
- + Cu(OH)<sub>2</sub>
- ChampDP
- GO

Figure S4. Free  $\text{Cu}^{2+}$  concentration in equilibrium with  $\text{Cu}(\text{OH})_2(\text{s})$  and  $\text{Cu}_2(\text{OH})_2\text{CO}_3(\text{s})$  as a function of pH.

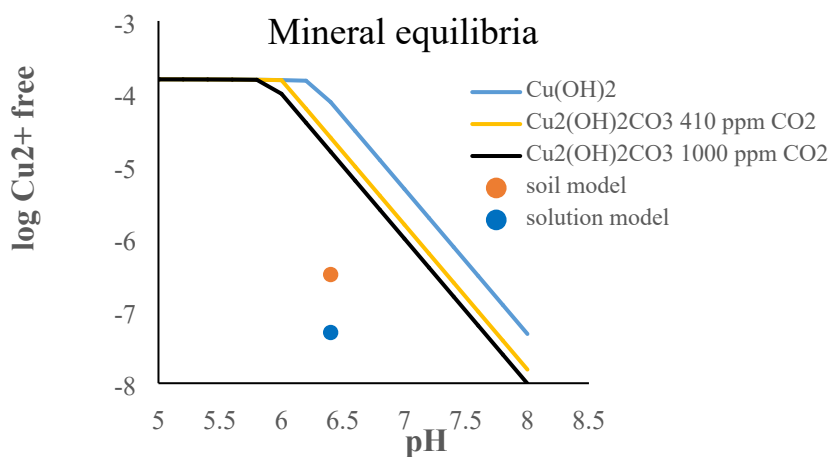

For  $\text{Cu}_2(\text{OH})_2\text{CO}_3(\text{s})$ , two gas phase  $\text{CO}_2$  concentrations (410 ppm (=atmospheric) and 1000 ppm) were included. 10 mM  $\text{CaCl}_2$  was included as background electrolyte. The maximum Cu concentration equals the total reactive Cu concentration in S1 after Cu addition ( $1.57 \cdot 10^{-4}$  M). The predictions of the free  $\text{Cu}^{2+}$  concentration in S1 after application of the Cu treatments by the soil and the solution model (indicated with the orange and blue dot, respectively) are well below the concentrations in equilibrium with the minerals. This suggests that these Cu-bearing minerals did not form (and limit the free  $\text{Cu}^{2+}$  concentration) as a result of Cu application.

Figure S5.  $\text{CaCl}_2$ -extractable Cu over a 29 days incubation for three soils (S1-S3) spiked with nine different forms of Cu. Results are expressed as the % of Cu added. Error bars are the standard deviation between triplicates (often smaller than the symbols). The data is the same as that presented to Figure 1 in the main document.

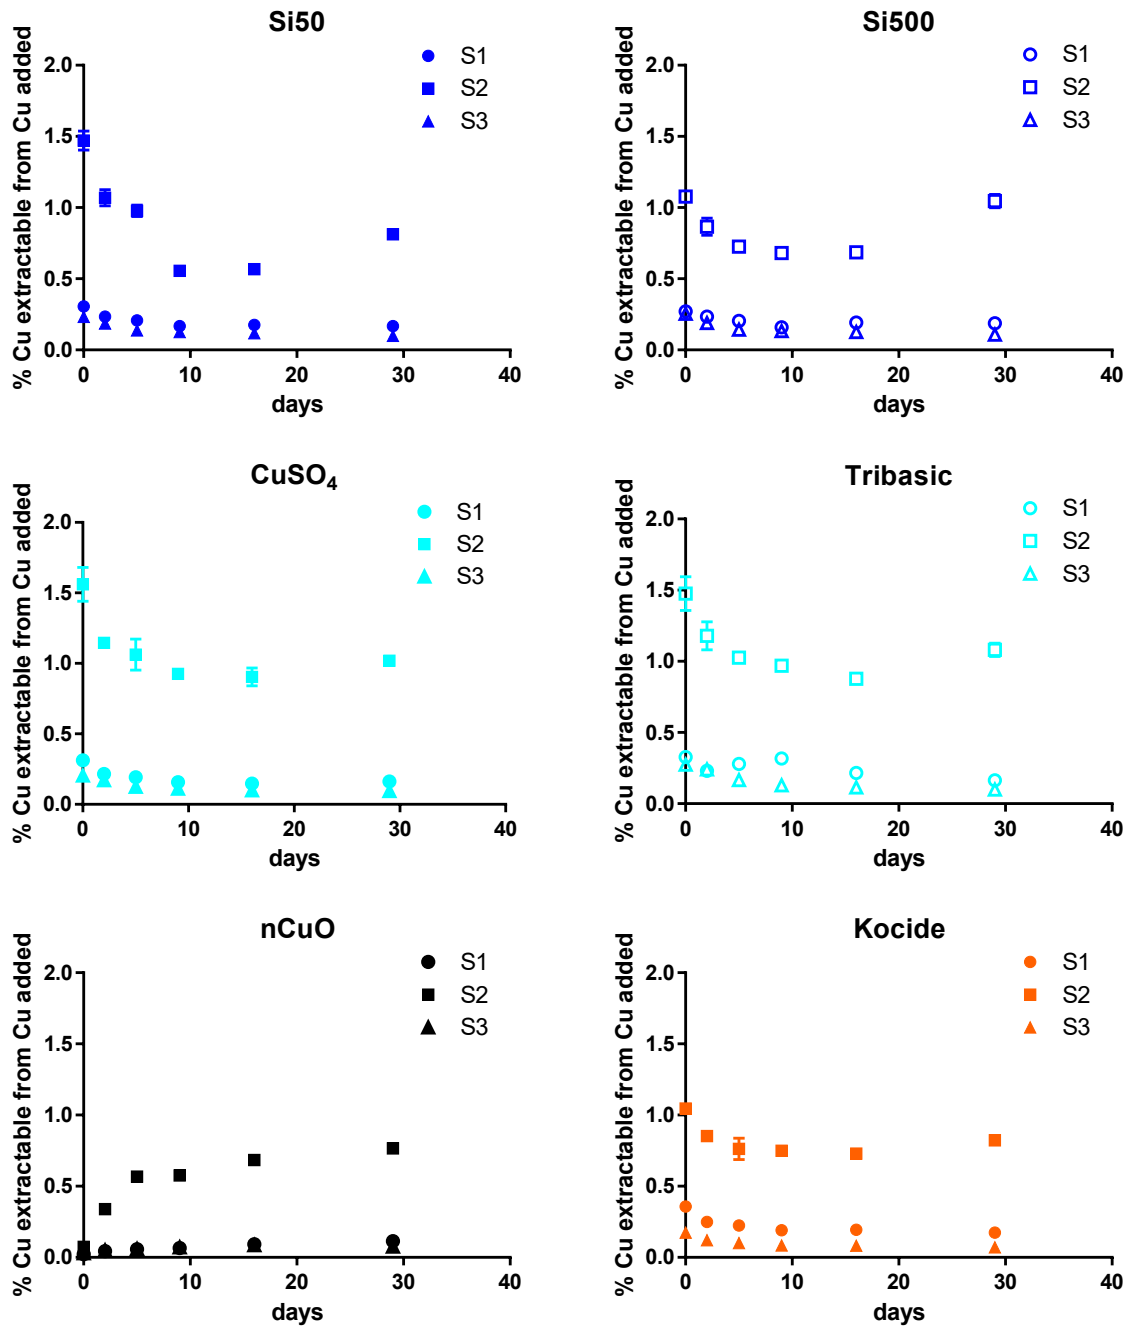



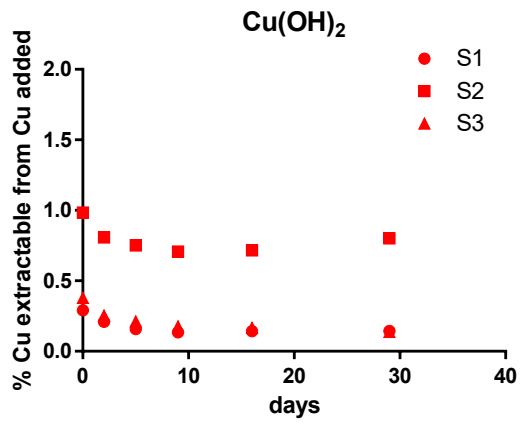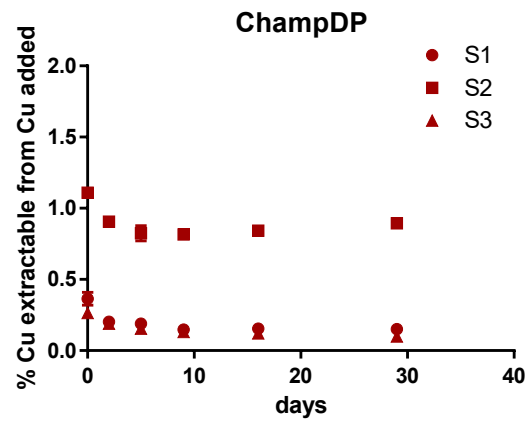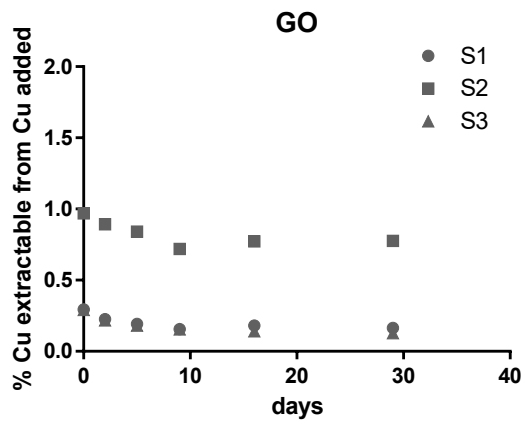

Supplement: d1en00213a1.pdf [file d1en00213a1.pdf]
